# Supplementary material for: Poly(glycerol itaconate) Crosslinking via the aza-Michael Reaction—A Preliminary Research
Source: MDPI journal article supplement (doi:10.3390/ma16237319), 2023-11-24
Supplement: s1 [file s1]

# Application of the aza-Michael reaction to crosslinking poly(glycerol itaconate) – a preliminary research

Magdalena Miętus<sup>1</sup>, Krzysztof Kolankowski<sup>1</sup>, Tomasz Gołofit<sup>1</sup>, Paweł Ruśkowski<sup>1</sup>, Marcin Mąkosa-Szczygieł<sup>2</sup>, Agnieszka Gadomska-Gajadur<sup>1\*</sup>

<sup>1</sup>Faculty of Chemistry of Warsaw University of Technology; Noakowskiego 3 Street, 00-664 Warsaw, Poland; magdalena.mietus.dokt@pw.edu.pl (M.M.); krzysztof.kolankowski.dokt@pw.edu.pl (K.K.); tomasz.golofit@pw.edu.pl (T.G.); pawel.ruskowski@pw.edu.pl (P.R.)

<sup>2</sup>Faculty of Natural Sciences, Department of Chemistry, Norwegian University of Science and Technology, 7034 Trondheim, Norway; marcin.k.makosa-szczygiel@stud.ntnu.no

\*Correspondence: agnieszka.gajadur@pw.edu.pl

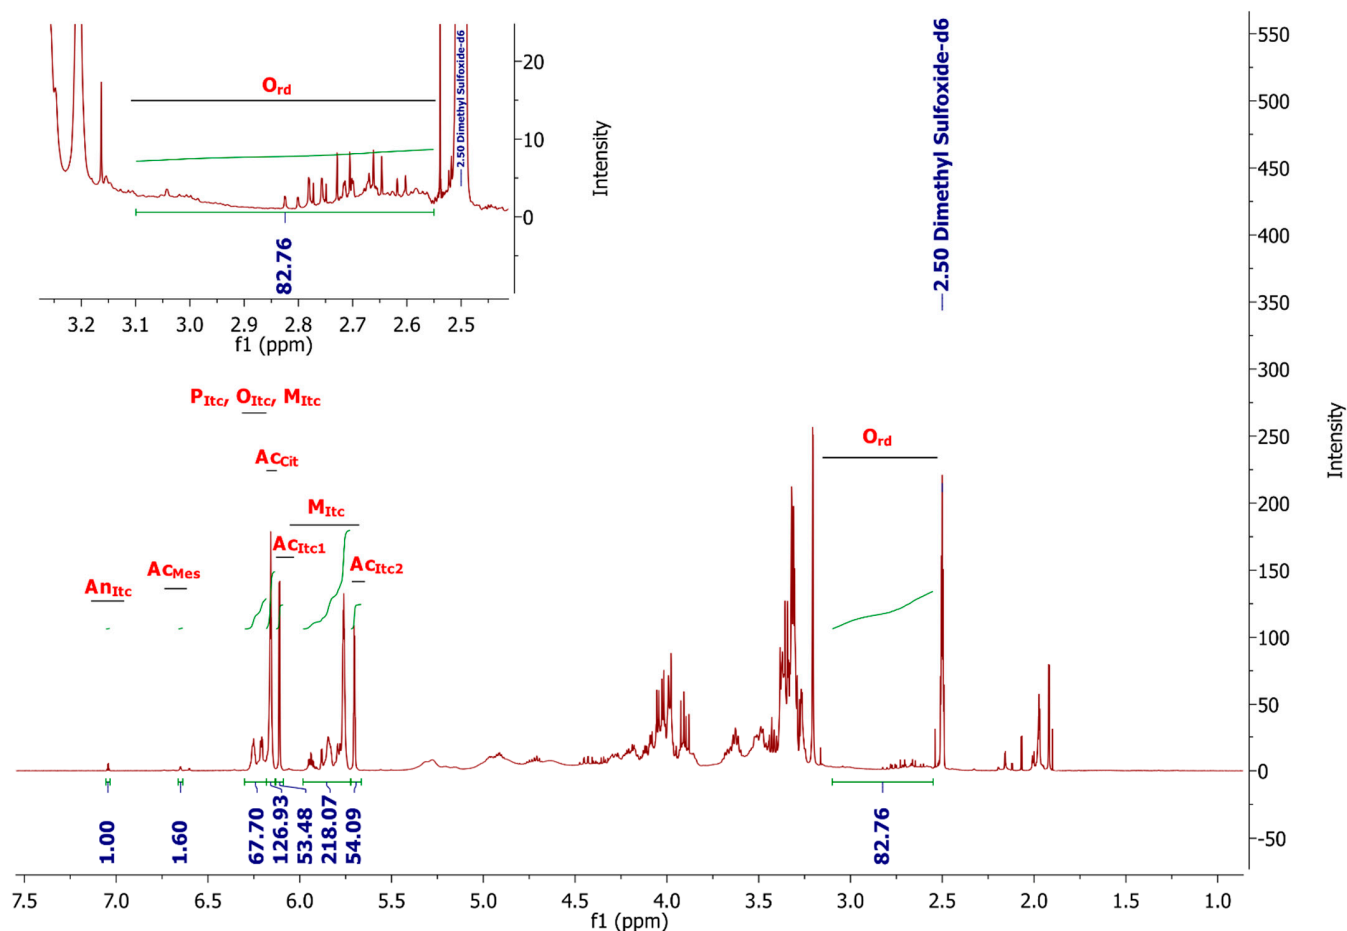

Figure S1. <sup>1</sup>H NMR spectrum of the PGIItc.

To calculate the esterification degree with the use of NMR spectra the following equation was used:

$$ED_{NMR} = (f_{P_{Itc}} + f_{M_{Itc}}) / (f_{P_{Itc}} + f_{M_{Itc}} + f_{AC_{Itc1}} + f_{AC_{Itc2}}) \times 100\% \quad (S1)$$

To calculate the proportion of isomerisation reactions of itaconic units to mesaconic units the following formula was used:

$$\%Is_{Mes} = (f_{AC_{Mes}} / (f_{AC_{Mes}} + \frac{1}{2} \times f_{P_{Itc}} + \frac{1}{2} \times f_{M_{Itc}})) \times 100\% \quad (S2)$$

The following equation was used to calculate the contribution of the Ordelt reaction:

$$\%O_{rd} = ((1/3 \times f_{O_{rd}}) / (1/3 \times f_{O_{rd}} + 1/2 \times f_{P_{Itc}} + 1/2 \times f_{M_{Itc}} + f_{Ac_{Mes}} + f_{Ac_{Cit}})) \times 100\% \quad (S3)$$

Where:

$f_{P_{Itc}}$  – The value of the integral of the signal is from the itaconic polyesters, oligoesters, monoesters;

$f_{M_{Itc}}$  – The value of the integral of the signal is from the itaconic monoesters;

$f_{Ac_{Itc1}}$  – The value of the integral of the signal is from the itaconic acid;

$f_{Ac_{Itc2}}$  – The value of the integral of the signal is from the itaconic acid;

$f_{An_{Itc}}$  – The value of the integral of the signal is from the itaconic anhydride;

$f_{Ac_{Mes}}$  – The value of the integral of the signal is from the mesaconic acid;

$f_{Ac_{Cit}}$  – The value of the integral of the signal is from the citraconic acid;

$f_{O_{rd}}$  – The value of the integral of the signal is from the Ordelt protons.

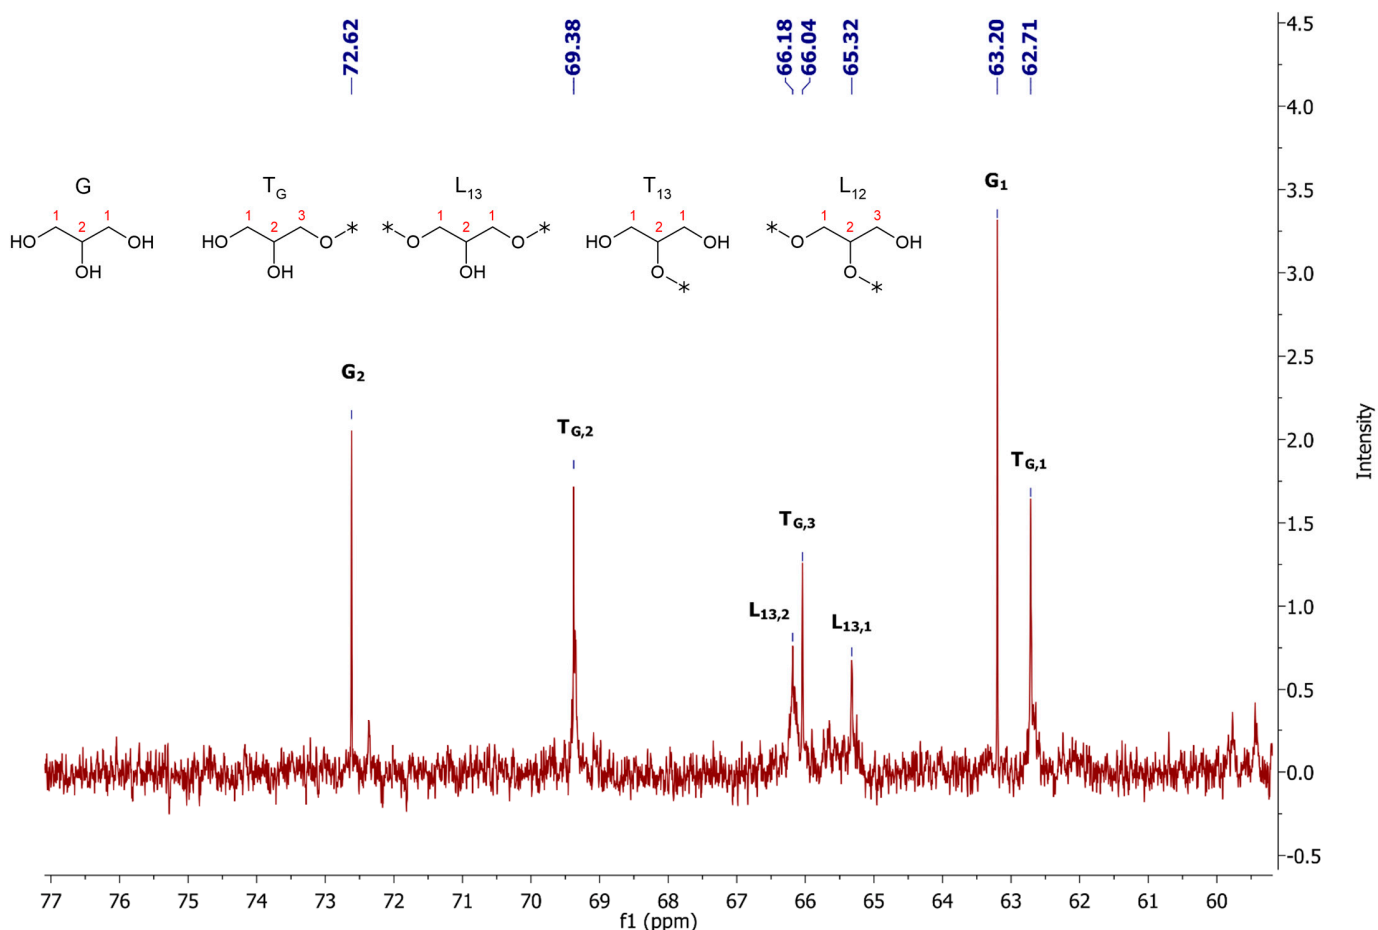

**Figure S2.**  $^{13}\text{C}$  NMR spectrum of the PGItc in the range of carbon atoms of glycerol together with the ways of substitution of glycerol.

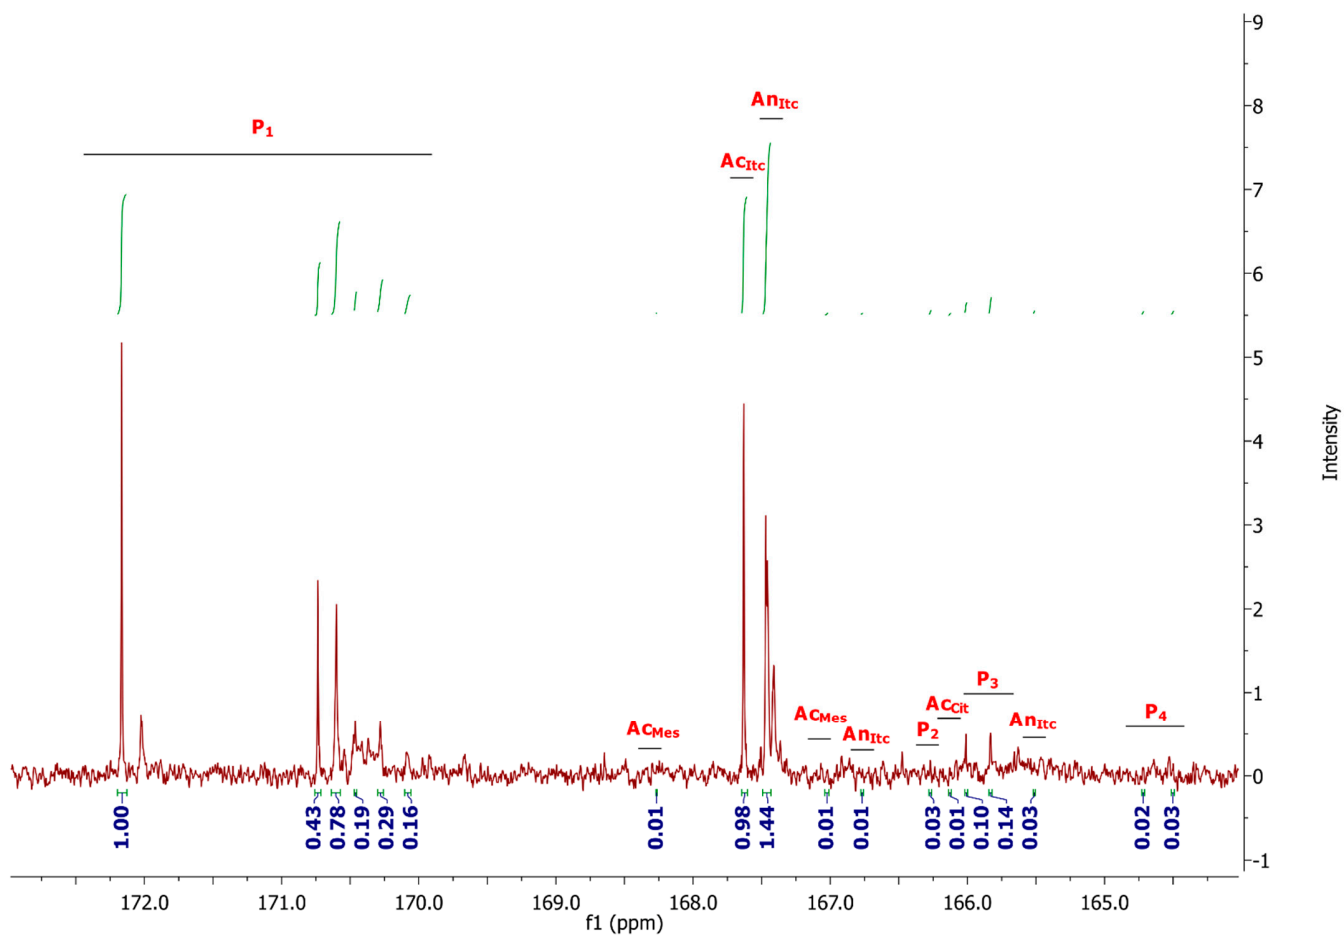

**Figure S3.**  $^{13}\text{C}$  NMR spectrum of the PGItc in the range of carbonyl atoms.

The following equation was used to calculate the itaconic acid conversion degree:

$$\%X_{^{13}\text{C}}^{\text{NMR}} = \left( \frac{(\int P_1 + \int P_2 + \int P_3 + \int P_4)}{(\int P_1 + \int P_2 + \int P_3 + \int P_4 + \int AC_{\text{Itc}})} \right) \times 100\% \quad (\text{S4})$$

Where:

$\int P_1 + \int P_2 + \int P_3 + \int P_4$  – the value of the integrals of the signals from the itaconic polyesters, oligoesters and monoesters.

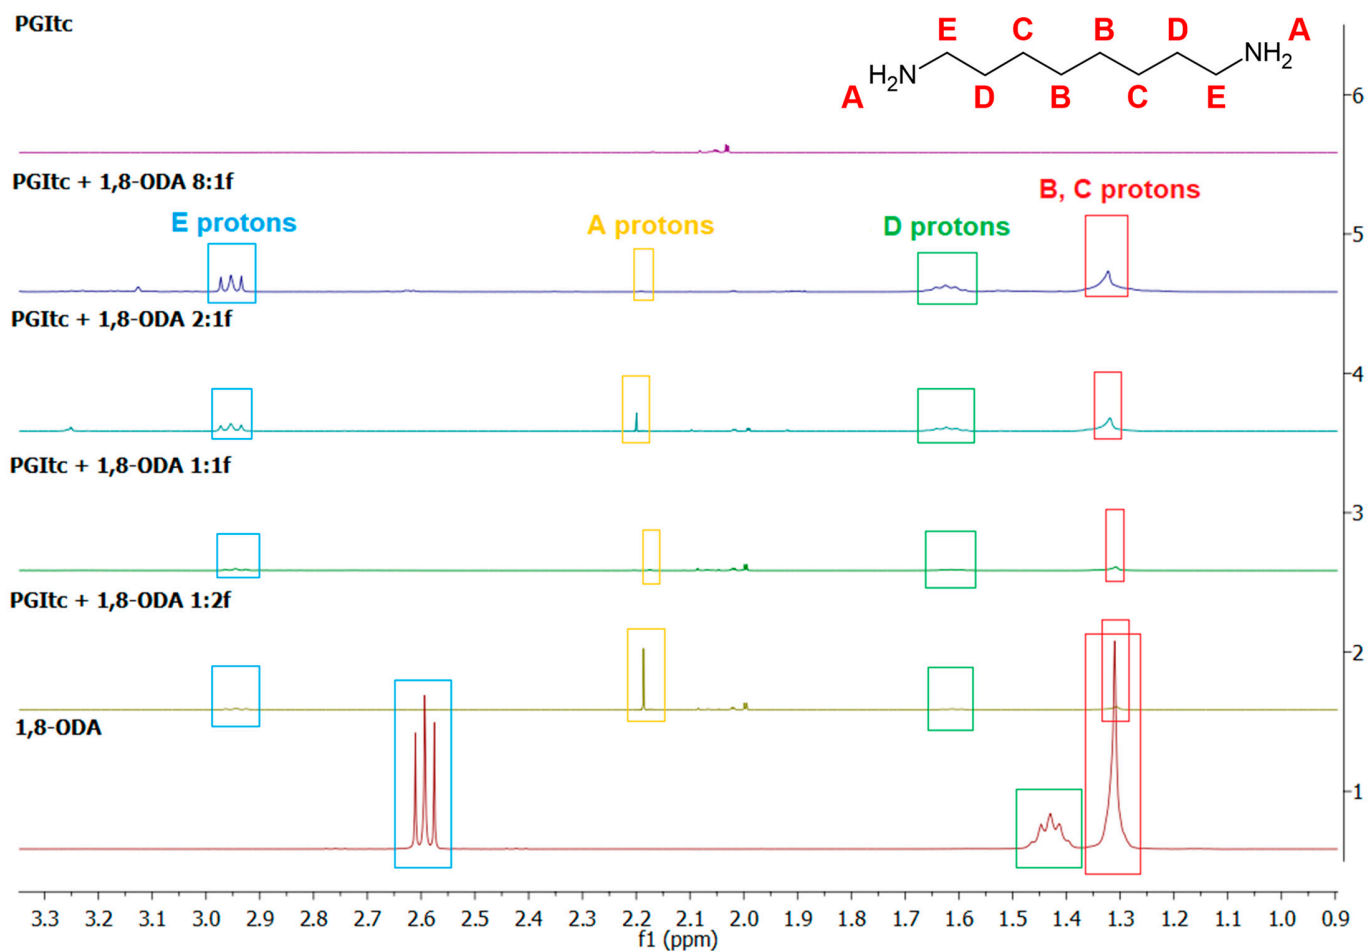

**Figure S4.** Fragments of  $^1\text{H}$  NMR spectra of the crosslinking products with 1,8-ODA (0.9 - 3.3 ppm) with the labeled protons of the used amine, taken in  $\text{D}_2\text{O}$ .

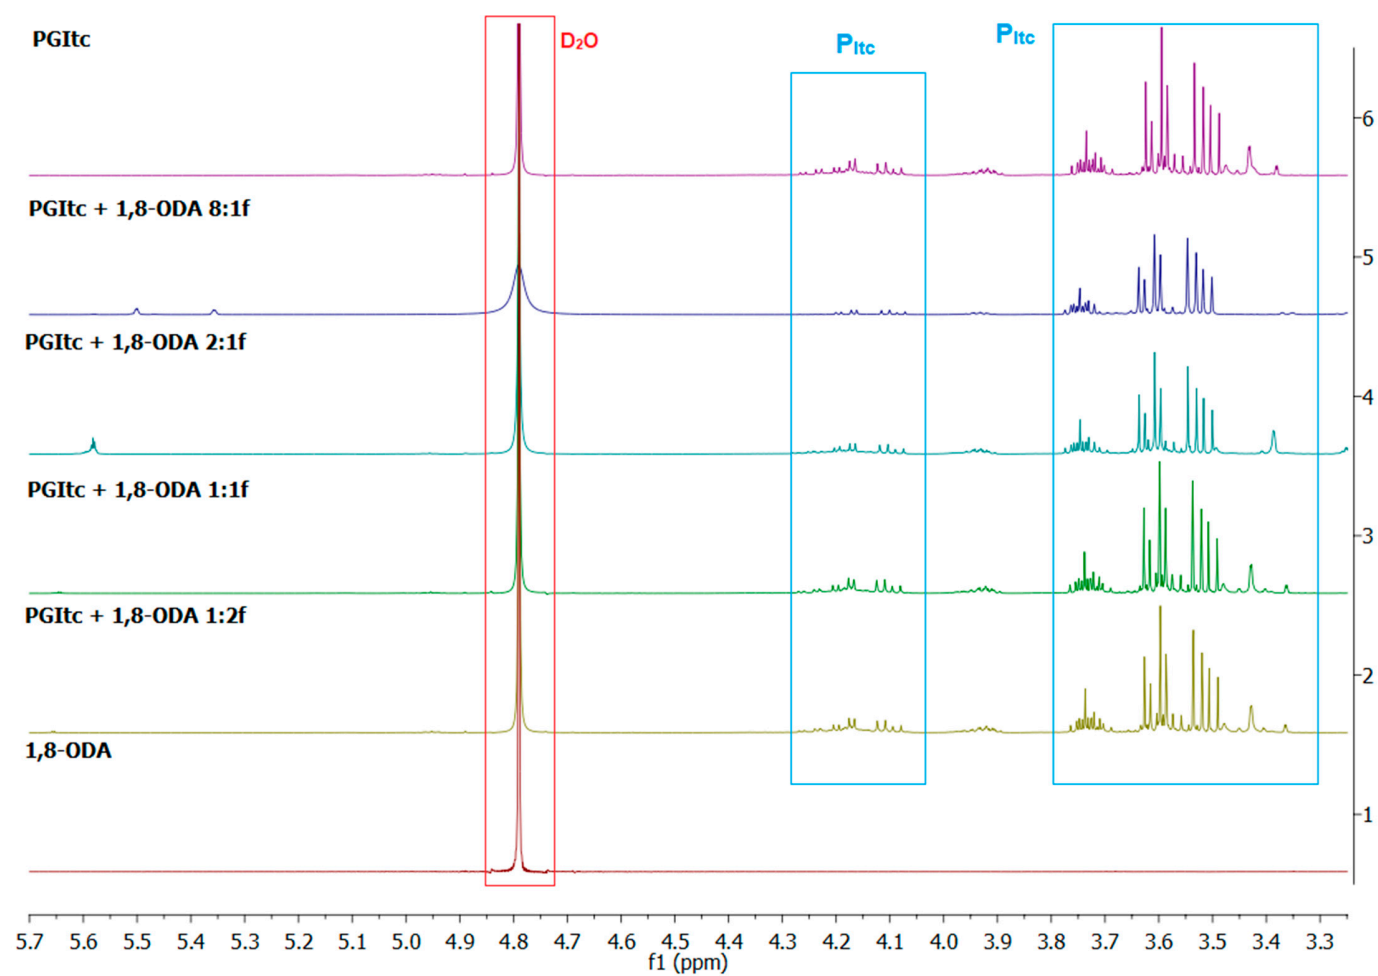

**Figure S5.** Fragments of <sup>1</sup>H NMR spectra of the crosslinking products with 1,8-ODA (3.3 – 5.7 ppm), taken in D<sub>2</sub>O.

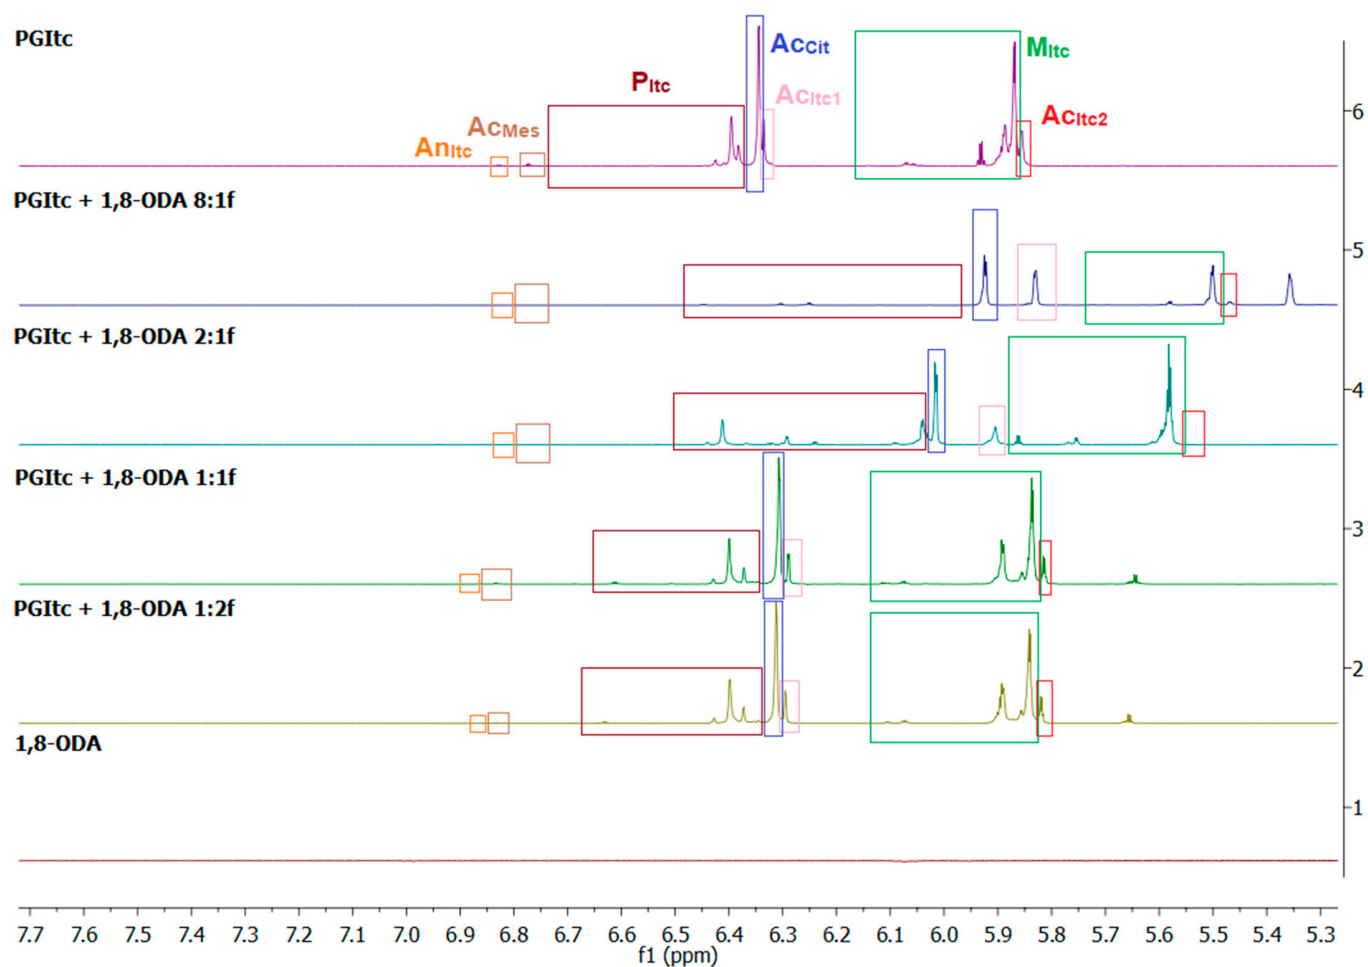

Figure S6. Fragments of  $^1\text{H}$  NMR spectra of the crosslinking products with 1,8-ODA (5.3 – 7.7 ppm), taken in  $\text{D}_2\text{O}$ .

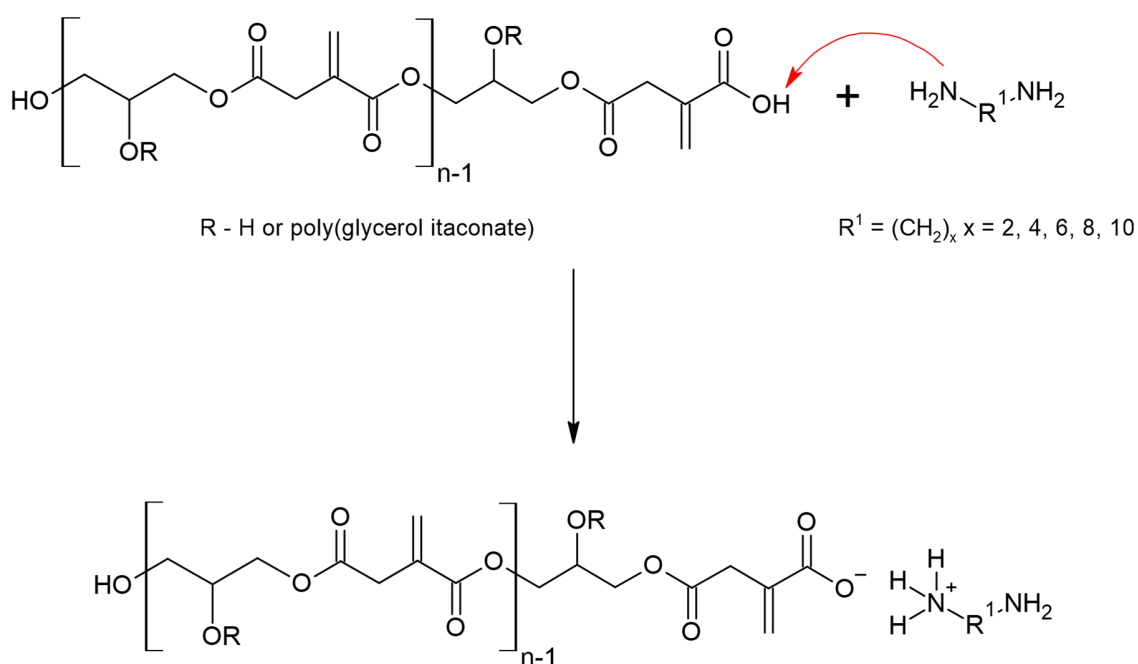

Figure S7. Formation of primary diamine salt.

**The calculations performed to determine the required amount of *t*-BuOH ( $m_{t\text{-BuOH}}$ ):**

The required  $m_{t\text{-BuOH}}$  was calculated based on the determined AN value for the PGItc sample (AN = 135.6). It corresponded to the number of milligrams of KOH that was required to esterify the free acid groups presented in 1 g of the test sample. To determine  $m_{t\text{-BuOH}}$ , the number of moles of KOH ( $n_{\text{KOH}}$ ) per reactor charge was determined ( $m_w = 35$  g):

$$n_{\text{KOH}} = ((\text{AN}_{\text{titr}} / 1000) / 56.1) \cdot m_w \quad (\text{S5})$$

The required amount of *t*-BuOH was determined, taking into account the 15% excess:

$$m_{t\text{-BuOH}} = (n_{\text{KOH}} + 0.15 \cdot n_{\text{KOH}}) \cdot 74.1 \quad (\text{S6})$$

**Table S1.** Conditions and results of performed crosslinking processes for PGItc.

| Functionality (Signature) | Amine | Maximum crosslinking temperature [°C] | Time of crosslinking [s] | Visual evaluation of product viscosity |
|---------------------------|-------|---------------------------------------|--------------------------|----------------------------------------|
| 1:2f (a1)                 | A1    | 55                                    | 49                       | +                                      |
| 1:1f (a2)                 |       | 57                                    | 54                       | ++                                     |
| 2:1f (a3)                 |       | 68                                    | 54                       | +                                      |
| 8:1f (a4)                 |       | 65                                    | 84                       | +                                      |
| 1:2f (b1)                 | A2    | 41                                    | 54                       | +++                                    |
| 1:1f (b2)                 |       | 55                                    | 73                       | +                                      |
| 2:1f (b3)                 |       | 60                                    | 120                      | +++                                    |
| 8:1f (b4)                 |       | 65                                    | 60                       | +                                      |
| 1:2f (c1)                 | A3    | 40                                    | 56                       | ++                                     |
| 1:1f (c2)                 |       | 41                                    | 89                       | ++                                     |
| 2:1f (c3)                 |       | 46                                    | 118                      | ++                                     |
| 8:1f (c4)                 |       | 62                                    | 185                      | +                                      |
| 1:2f (d1)                 | A4    | 34                                    | 46                       | +++                                    |
| 1:1f (d2)                 |       | 35                                    | 37                       | +++                                    |
| 2:1f (d3)                 |       | 50                                    | 41                       | +++                                    |
| 8:1f (d4)                 |       | 49                                    | 45                       | ++                                     |
| 1:2f (e1)                 | A5    | 38                                    | 95*                      | +                                      |
| 1:1f (e2)                 |       | 42                                    | 60*                      | +                                      |
| 2:1f (e3)                 |       | 50                                    | 50*                      | +                                      |
| 8:1f (e4)                 |       | 82                                    | 40*                      | +                                      |

Where

\* The amine started to crystallise during mixing with the polymer sample

+++ Product is well dense, does not stretch without the use of force

++ Product is partially dense, weakly stretches without the use of force

+ Product is easily extractable without the use of force

**Table S2.** FTIR signals of the aza-Michael adduct, poly(glycerol itaconate) and 1,8-octanediamine.

| Wavenumber $\nu$ [cm <sup>-1</sup> ] | Observed vibration                                                                    | Symbol        |
|--------------------------------------|---------------------------------------------------------------------------------------|---------------|
| 3200–3550                            | O-H bond stretching vibrations                                                        | A and A'      |
| 3300–3500                            | N-H bond stretching vibrations                                                        | B             |
| 2960–2925                            | C-H bond stretching vibrations of the methylene group                                 | C, C' and C'' |
| 1730-1715                            | Stretching vibrations of the C=O carbonyl group of $\alpha,\beta$ -unsaturated esters | D             |

|           |                                                              |          |
|-----------|--------------------------------------------------------------|----------|
|           | Stretching vibrations of the C=O carbonyl group of esters    | D'       |
| 1680-1630 | Stretching vibrations of the C=C double bond                 | E and E' |
| ~1560     | N-H bending vibration of NH <sub>3</sub> <sup>+</sup> group  | F        |
| ~1382     | Deformation vibration of the C-H bond of the methylene group | G and G' |
| ~1156     | C-O bond stretching vibrations of the acyl group             | H and H' |
| ~1035     | C-O bond stretching vibrations of the alkoxy group           | I and I' |

**Table S3.** Glass transition temperature during first and second heating of PGI<sub>tc</sub> and crosslinked samples based on DSC analysis.

| Amine | $T_{g1}$<br>[°C] | $T_{g2}$<br>[°C] | $\Delta T_g (T_{g1} - T_{g2})$<br>[°C] |
|-------|------------------|------------------|----------------------------------------|
| -     | -58.0            | -42.3            | -15.7                                  |
| A2    | -48.6            | -48.5            | -0.1                                   |
| A3    | -53.7            | -44.0            | -9.7                                   |
| A4    | -51.8            | -44.0            | -7.8                                   |
| A5    | -51.4            | -46.6            | -4.8                                   |

**Table S4.** TG analysis DSC analysis of crosslinked samples.

| Amine | $T_d$ 5%<br>[°C] | $T_d$ 50%<br>[°C] | $T_d$ 85%<br>[°C] |
|-------|------------------|-------------------|-------------------|
| A2    | 144.5            | 283.9             | 469.5             |
| A3    | 141.2            | 262.3             | 457.4             |
| A4    | 130.6            | 276.5             | 422.0             |
| A5    | 141.7            | 267.8             | 452.8             |
